# Supplementary material
Source: publisher figshare collection journal article supplement (https://karger.figshare.com/ndownloader/files/8708425)
Supplement: Supplementary file 1 [file 8708425]

# **RAGE deficiency does not affect renal injury and damage upon ischemia/reperfusion-induced injury.**

Mark C. Dessing, Wilco P. Pulskens, Gwendoline J. Teske, Loes M. Butter, Tom van der Poll, Huan Yang, Kevin J. Tracey, Peter P. Nawroth, Angelika Bierhaus, Sandrine Florquin and Jaklien C. Leemans

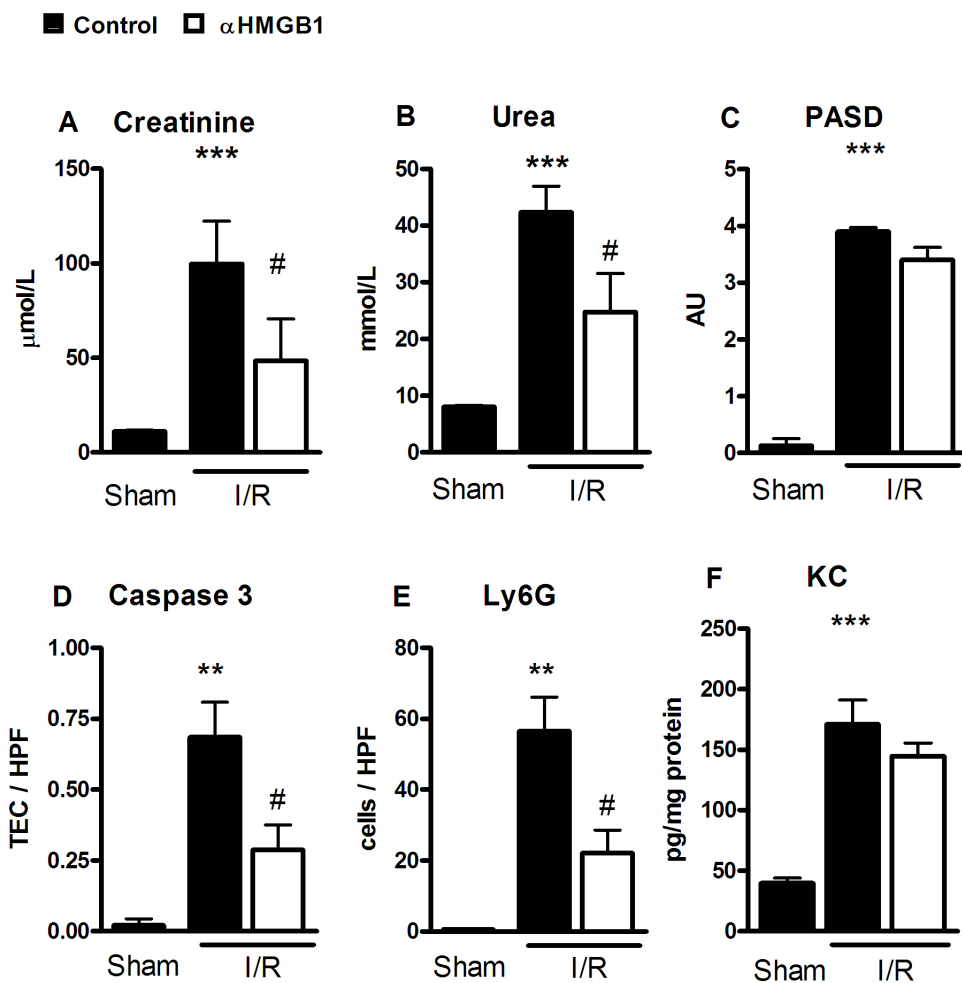

Figure S1: HMGB1 contributes to renal I/R-induced injury. Plasma levels of creatinine (S1A) and urea (S1B), tubular damage (PASD; S1C), amount of apoptotic TECs (Caspase 3; S1D), granulocytes (Ly6G; S1E) and levels of KC (S1E) in WT mice treated with control IgG (black bars) or  $\alpha$ HMGB1 (white bars) 1 day after surgery. \*\* $P < 0.01$ , \*\*\* $P < 0.005$  versus sham, # $P < 0.05$  versus I/R control IgG. AU=arbitrary unit, HPF=high power field.
